# Supplementary material for: The unexpectedly rich reconstructions of rutile TiO2(011)-(2 × 1) surface and the driving forces behind their formation: an ab initio evolutionary study
Source: Royal Society of Chemistry journal article supplement (doi:10.1039/c6cp01203e), 2016-01-01
Supplement: c6cp01203e1.pdf [file c6cp01203e1.pdf]

## Unexpectedly rich structures of rutile $\text{TiO}_2(011)-(2\times 1)$ and driving forces behind their formations: an *ab initio* evolutionary study

Qinggao Wang<sup>1,3†</sup>, Artem R. Oganov<sup>2, 1,4,5</sup>, Oleg D. Feya<sup>1</sup>, Qiang Zhu<sup>4</sup>, and Dongwei Ma<sup>3</sup>

<sup>1</sup> Moscow Institute of Physics and Technology, 9 Institutskiy Lane, Dolgoprudny City, Moscow Region, 141700, Russia

<sup>2</sup> Skolkovo Institute of Science and Technology, Skolkovo Innovation Center, 3 Nobel St., Moscow 143026, Russia

<sup>3</sup> Department of Physics and Electrical Engineering, Anyang Normal University, Anyang, Henan Province, 455000, the People's Republic of China

<sup>4</sup> Department of Geosciences and Center for Materials by Design, Stony Brook University, Stony Brook, New York 11794, USA

<sup>5</sup> School of Materials Science and Engineering, Northwestern Polytechnical University, Xi'an, Shanxi 710072, People's Republic of China

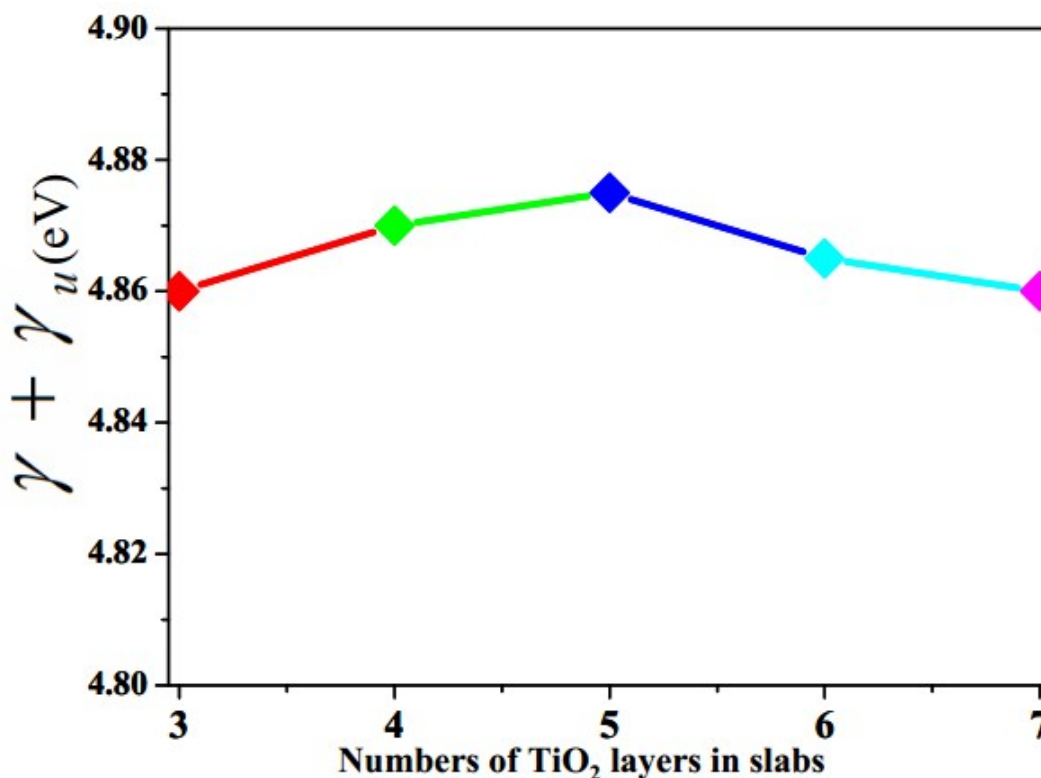

The changes of surface energy for unreconstructed  $\text{TiO}_2$  rutile (011) with slab thickness

<sup>†</sup>Corresponding author: wangqinggao1984@126.com
